# Supplementary material for: Synthesis of dual-functional Ag/Au nanoparticles based on the decreased cavitating rate under alkaline conditions and the colorimetric detection of mercury(ii) and lead(ii)
Source: Royal Society of Chemistry journal article supplement (doi:10.1039/c8tc01867g), 2018-01-01
Supplement: c8tc01867g1.pdf [file c8tc01867g1.pdf]

## SUPPORTING INFORMATION

Table S1. Peaks information of Au/Ag elements from XPS spectrum at different pH values.

| pH   | Name                | Peak BE | FWHM ev | Area (P) CPS.ev | Atomic % | Ag/Ag |
|------|---------------------|---------|---------|-----------------|----------|-------|
| 6.5  | Ag3d <sub>3/2</sub> | 373.75  | 0.43    | 3208.08         | 28.7     | 2.46  |
|      | Ag3d <sub>5/2</sub> | 367.76  | 1.03    | 4747.56         | 42.41    |       |
|      | Au4f <sub>5/2</sub> | 87.48   | 0.87    | 1374.45         | 12.34    |       |
|      | Au4f <sub>7/2</sub> | 83.81   | 0.86    | 1843.73         | 16.55    |       |
| 8.5  | Ag3d <sub>3/2</sub> | 373.92  | 1.08    | 1292.31         | 30.37    | 2.34  |
|      | Ag3d <sub>5/2</sub> | 367.87  | 1.16    | 1694.59         | 39.73    |       |
|      | Au4f <sub>5/2</sub> | 87.61   | 0.97    | 536.69          | 12.65    |       |
|      | Au4f <sub>7/2</sub> | 83.92   | 0.98    | 732.72          | 17.26    |       |
| 10.5 | Ag3d <sub>3/2</sub> | 373.74  | 1.08    | 440.22          | 22.45    | 2.21  |
|      | Ag3d <sub>5/2</sub> | 367.84  | 0.87    | 911.10          | 46.39    |       |
|      | Au4f <sub>5/2</sub> | 87.52   | 0.91    | 269.42          | 13.79    |       |
|      | Au4f <sub>7/2</sub> | 83.95   | 0.98    | 339.63          | 17.37    |       |
